# Supplementary material for: Have improvements in ozone air quality reduced ozone uptake into plants?
Source: Oxford University Press journal article supplement (doi:10.1525/elementa.399), 2020-01-01
Supplement: elementa-8-399-s5.pdf [file elementa-8-399-s5.pdf]

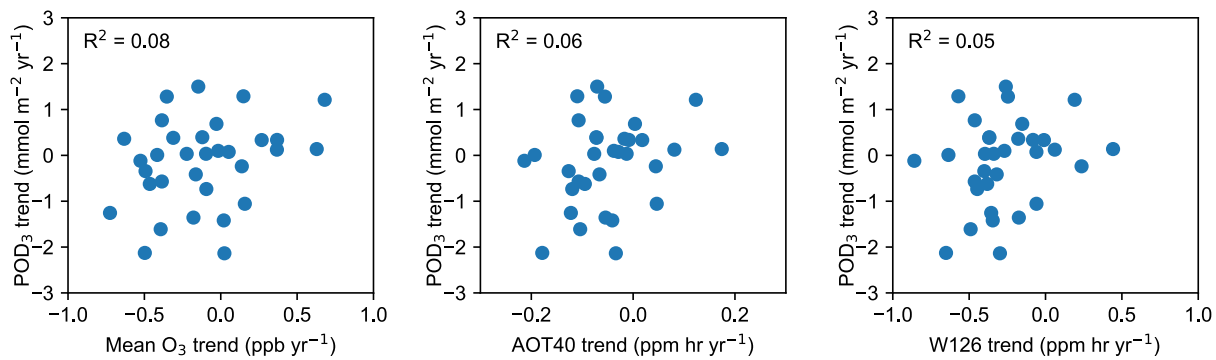

**Figure S3. Co-variation of temporal trends in POD<sub>3</sub> and concentration metrics.** As in Figure 4, each point represents fitted trends at a single site.
